# Supplementary material
Source: Copernicus journal article supplement (doi:10.5194/bg-23-2155-2026)
Supplement: Supplementary file 1 [file bg-23-2155-2026-supplement.pdf]

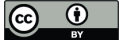

*Supplement of*

## **Characterisation and quantification of organic carbon burial using a multiproxy approach in saltmarshes from Aotearoa New Zealand**

**Olga Albot et al.**

*Correspondence to:* Olga Albot (olya.albot@vuw.ac.nz)

The copyright of individual parts of the supplement might differ from the article licence.

**Table S1:** Locations, the total number of cores collected across marsh zones (total depth in brackets), and the surrounding vegetation types for each study site.

| Marsh Zone                             | Core              | Location (WGS84)         | Dominant Vegetation                                                                                                                                                                                             |
|----------------------------------------|-------------------|--------------------------|-----------------------------------------------------------------------------------------------------------------------------------------------------------------------------------------------------------------|
| <b>Pāuatahanui Wildlife Reserve</b>    |                   |                          |                                                                                                                                                                                                                 |
| Low marsh                              | Pau-LM1 (18 cm)   | -41.0996522, 174.9150162 | <i>Juncus kraussii</i> with sparse <i>Kindberdia</i> spp. and <i>Polytrichum</i> spp.                                                                                                                           |
|                                        | Pau-LM2 (30 cm)   | -41.0983717, 174.9138370 |                                                                                                                                                                                                                 |
|                                        | Pau-LM3 (15 cm)   | -41.1006246, 174.9138819 |                                                                                                                                                                                                                 |
|                                        | Pau-LM4 (28 cm)   | -41.1035482, 174.9114934 |                                                                                                                                                                                                                 |
| Mid marsh                              | Pau-MM1 (20 cm)   | -41.0991782, 174.9157722 | <i>Apodasmia similis</i> , <i>Plagianthus divaricatus</i> , <i>Typha orientalis</i> , <i>Lolium arundinaceum</i> , sparse <i>Kindberdia</i> spp. and <i>Polytrichum</i> spp.                                    |
|                                        | Pau-MM2 (16 cm)   | -41.0973502, 174.9145763 |                                                                                                                                                                                                                 |
|                                        | Pau-MM3 (15 cm)   | -41.1022903, 174.9146370 |                                                                                                                                                                                                                 |
|                                        | Pau-MM4 (44 cm)   | -41.1039568, 174.9087110 |                                                                                                                                                                                                                 |
| High marsh                             | Pau-HM1 (24 cm)   | -41.0992224, 174.9170620 | <i>Plagianthus divaricatus</i> , <i>Poa annua</i> , <i>Selliera radicans</i> , <i>Carex flagellifera</i> , <i>Lolium arundinaceum</i> , <i>Carex coriacea</i> , <i>Typha orientalis</i> , <i>Phormium tenax</i> |
|                                        | Pau-HM2 (20 cm)   | -41.0974905, 174.9166265 |                                                                                                                                                                                                                 |
|                                        | Pau-HM3 (16 cm)   | -41.1021537, 174.9157384 |                                                                                                                                                                                                                 |
|                                        | Pau-HM4 (27 cm)   | -41.1059960, 174.9133733 |                                                                                                                                                                                                                 |
| <b>Robert Findlay Wildlife Reserve</b> |                   |                          |                                                                                                                                                                                                                 |
| Low marsh                              | Puk-LM1 (5 cm)    | -37.1829576, 175.3222302 | <i>Samolus repens</i> and <i>Salicornia quinqueflora</i>                                                                                                                                                        |
|                                        | Puk-LM2 (10 cm)   | -37.1822626, 175.3221232 |                                                                                                                                                                                                                 |
|                                        | Puk-LM3 (5 cm)    | -37.1793629, 175.3222583 |                                                                                                                                                                                                                 |
| Mid marsh                              | Puk-MM1 (12 cm)   | -37.1764619, 175.3204250 | <i>Carex divisa</i> , <i>Selliera radicans</i> , <i>Isolepis cernua</i>                                                                                                                                         |
|                                        | Puk-MM2 (12 cm)   | -37.1795753, 175.3227817 |                                                                                                                                                                                                                 |
|                                        | Puk-MM3 (10 cm)   | -37.1822105, 175.3214345 |                                                                                                                                                                                                                 |
| High marsh                             | Puk-HM1 (5 cm)    | -37.1755747, 175.3205353 | <i>Bromus catharticus</i> , <i>Polypogon viridis</i> , <i>Epilobium ciliatum</i> , <i>Carex divisa</i>                                                                                                          |
|                                        | Puk-HM2 (10 cm)   | -37.1799204, 175.3229108 |                                                                                                                                                                                                                 |
|                                        | Puk-HM3 (10 cm)   | -37.1824418, 175.3212890 |                                                                                                                                                                                                                 |
| <b>Omaia Island</b>                    |                   |                          |                                                                                                                                                                                                                 |
| Low marsh                              | Oma-LM1 (20 cm)   | -34.9844134, 173.2648659 | <i>Pasture</i> , <i>Cotula coronopifolia</i> , <i>Lagurus ovatus</i> , <i>Polypogon monspeliensis</i> and <i>Lobelia anceps</i>                                                                                 |
|                                        | Oma-LM2 (34 cm)   | -34.9960895, 173.2589576 |                                                                                                                                                                                                                 |
|                                        | Oma-LM3 (30 cm)   | -35.0009796, 173.2692111 |                                                                                                                                                                                                                 |
| Mid marsh                              | Oma-MM1 (20 cm)   | -34.9890245, 173.2640991 |                                                                                                                                                                                                                 |
|                                        | Oma-MM2 (14 cm)   | -34.9900862, 173.2639586 |                                                                                                                                                                                                                 |
|                                        | Oma-MM3 (20 cm)   | -34.9976081, 173.2615339 |                                                                                                                                                                                                                 |
| High marsh                             | Oma-HM1 (29.5 cm) | -34.9951711, 173.2631915 |                                                                                                                                                                                                                 |
|                                        | Oma-HM2 (20 cm)   | -34.9953268, 173.2623952 |                                                                                                                                                                                                                 |
|                                        | Oma-HM3 (22 cm)   | -34.9980382, 173.2661889 |                                                                                                                                                                                                                 |
| <b>Okatakata Islands</b>               |                   |                          |                                                                                                                                                                                                                 |
| Low marsh                              | Oka-LM1 (47 cm)   | -34.9920759, 173.2734023 | <i>Juncus kraussii</i> , <i>Salicornia quinqueflora</i> , sparse <i>Kindberdia</i> spp. and <i>Polytrichum</i> spp.                                                                                             |
|                                        | Oka-LM2 (30 cm)   | -34.9879439, 173.2758958 |                                                                                                                                                                                                                 |
|                                        | Oka-LM3 (30 cm)   | -34.9840782, 173.2801531 |                                                                                                                                                                                                                 |
| Mid marsh                              | Oka-MM1 (30 cm)   | -34.9830517, 173.2799168 | <i>Apodasmia similis</i> , <i>Machaerina juncea</i> , sparse <i>Kindberdia</i> spp. and <i>Polytrichum</i> spp.                                                                                                 |
|                                        | Oka-MM2 (20 cm)   | -34.9874470, 173.2751894 |                                                                                                                                                                                                                 |
|                                        | Oka-MM3 (30 cm)   | -34.9918548, 173.2737624 |                                                                                                                                                                                                                 |
| High marsh                             | Oka-HM1 (15 cm)   | -34.9827858, 173.2796975 | <i>Cyperus ustulatus</i> , <i>Ficinia nodosa</i> , <i>Austroderia splendens</i> , <i>Cortaderia jubata</i>                                                                                                      |
|                                        | Oka-HM2 (20 cm)   | -34.9859390, 173.2754546 |                                                                                                                                                                                                                 |
|                                        | Oka-HM3 (20 cm)   | -34.9912065, 173.2742546 |                                                                                                                                                                                                                 |
| <b>Awanui</b>                          |                   |                          |                                                                                                                                                                                                                 |
| Low marsh                              | Awa-LM1 (6 cm)    | -35.0049151, 173.2670039 | <i>Salicornia quinqueflora</i> and <i>Juncus kraussii</i>                                                                                                                                                       |
|                                        | Awa-LM2 (5 cm)    | -35.0049596, 173.2663042 |                                                                                                                                                                                                                 |
|                                        | Awa-LM3 (30 cm)   | -35.0050615, 173.2642325 |                                                                                                                                                                                                                 |
| Mid marsh                              | Awa-MM1 (40 cm)   | -35.0052644, 173.2634138 | <i>Apodasmia similis</i> , <i>Machaerina juncea</i> , sparse <i>Kindberdia</i> spp. and <i>Polytrichum</i> spp.                                                                                                 |
|                                        | Awa-MM2 (95 cm)   | -35.0106002, 173.2612322 |                                                                                                                                                                                                                 |
|                                        | Awa-MM3 (45 cm)   | -35.0103981, 173.2614833 |                                                                                                                                                                                                                 |

Core Pau-HM3

Coordinates: -41.1021537, 174.9157834

Author: O. Albot

| Depth (cm)                                                     | Photo | Illustration | Description and components                                      | Nig | Strf | Sicc | Elas | Lim |
|----------------------------------------------------------------|-------|--------------|-----------------------------------------------------------------|-----|------|------|------|-----|
| 0<br>2<br>4<br>6<br>8<br>10<br>12                              |       |              | Dark brown, rooty, clayey peat<br>Sh2 Th1As1Ag+                 | 3   | 0    | 3    | 1    |     |
| 12<br>14<br>16                                                 |       |              | Dark brown, organic-rich silt with fine sand component Ag3, Ga1 | 3   | 0    | 3    | 2    | 0   |
| 16<br>18<br>20<br>22                                           |       |              | Light greyish brown, sub-rounded medium sand<br>Ga4             | 1   | 0    | 3    | 3    | 1   |
| 22<br>24<br>26<br>28<br>30<br>32<br>34<br>36<br>38<br>40<br>42 |       |              |                                                                 |     |      |      |      |     |

MB(C)

Overlying vegetation: 100% *Lolium arundinaceum*

**Figure S1:** Detailed stratigraphic log for core Pau-HM3 from Pāuatahanui following the Troels-Smith (1955) sediment classification system. MB (C) – marsh base via correlation with other cores.

Core Puk-MM1

Coordinates: -37.1764619, 175.3204250

Author: O. Albot

| Depth (cm) | Photo | Illustration | Description and components                                                                                                                       | Nig | Strf | Sicc | Elas | Lim |
|------------|-------|--------------|--------------------------------------------------------------------------------------------------------------------------------------------------|-----|------|------|------|-----|
| 0          |       |              | Woody, TI-dominated peat<br>Tl2 Sh1 Th1 Dh++ Dl+ Dg+                                                                                             | 3.5 | 0    | 2    | 3    |     |
| 2          |       |              | Gradual transition to underlying unit                                                                                                            |     |      |      |      |     |
| 4          |       |              | Brown, organic-rich silty clay. Ag to As (downwards transition), with common shell fragments and root/plant material<br>Ag2 As2 Th++ Dh+ Dl+ Dg+ | 3   | 0    | 2    | 3    | 0   |
| 6          |       |              | Gradual transition to underlying unit                                                                                                            |     |      |      |      |     |
| 8          |       |              | Gradual transition to underlying unit                                                                                                            |     |      |      |      |     |
| 10         |       |              | Grey clay with shell and plant material<br>As4 Dg++ Dh+ Di+ Th+                                                                                  | 2   | 0    | 2    | 0.5  | 0   |
| 12         |       |              | As above but with minor sand and silt component<br>As3 Ga1 Ag1 Dg++ Dh+ Di+ Th+                                                                  | 2   | 0    | 2    | 0.5  | 0   |
| 14         |       |              |                                                                                                                                                  |     |      |      |      |     |
| 16         |       |              |                                                                                                                                                  |     |      |      |      |     |
| 18         |       |              |                                                                                                                                                  |     |      |      |      |     |
| 20         |       |              |                                                                                                                                                  |     |      |      |      |     |

Overlying vegetation: 98% *Carex divisa*, 2% *Salicornia quinqueflora*. Trace: *Lolium arundinaceum*, *Foeniculum vulgare*, *Polypogon viridis*  
 Base of marsh based on correlation with Puk-LM3 & HM2.

**Figure S2:** Detailed stratigraphic log for core Puk-MM1 from Robert Findlay following the Troels-Smith (1955) sediment classification system. MB(C) = marsh base via correlation with other cores.

Core Oma-MM3

Coordinates: -34.9976081, 173.2615339

Author: D.J. King & O. Albot

| Depth (cm) | Photo | Illustration | Description and components                                                                                            | Nig | Strf | Sicc | Elas | Lim |    |
|------------|-------|--------------|-----------------------------------------------------------------------------------------------------------------------|-----|------|------|------|-----|----|
| 0          |       |              | Medium to dark brown silt with <i>Lolium perenne</i> fragments and leaves of assorted plants.<br>Ag2 Th1 Dh1 Ga++ Sh+ | 2   | 0    | 4    | 2    |     |    |
| 5          |       |              | Dark brown fine sandy silt with roots<br>Ag2 Ga1 As1 Th+ Dg+                                                          | 3   | 1    | 2    | 1    | 1   |    |
| 10         |       |              | Slightly greenish medium brown clay with roots<br>As3 Ga1 Th++ Ag+ Sh+ Dh+                                            | 2   | 1    | 3    | 1    | 1   | SF |
| 15         |       |              | Chocolate brown silty clay with roots<br>As1 Ag1 Th1 Ga1                                                              | 2   | 0    | 2    | 0    | 1   |    |
| 20         |       |              |                                                                                                                       |     |      |      |      |     |    |
| 25         |       |              |                                                                                                                       |     |      |      |      |     |    |

Overlying vegetation: See Table S4.1.

Duplicates of this core extend to 46 cm depth, getting sandier below 36.5 cm. Absence of foraminifera below ~20 cm indicates a potentially terrestrial (non-salt marsh) soil underlying the marsh in this core.

**Figure S3:** Detailed stratigraphic log for core Oma-MM3 from Omaia following the Troels-Smith (1955) sediment classification system. SF = saltmarsh foraminifera; MB = marsh base; NF = no foraminifera.

Core Oka-MM1

Coordinates: -34.9830517, 173.2799168

Author: O. Albot

| Depth (cm) | Photo | Illustration | Description and components                                                                                                                                           | Nig | Strf | Sicc | Elas | Lim |
|------------|-------|--------------|----------------------------------------------------------------------------------------------------------------------------------------------------------------------|-----|------|------|------|-----|
| 0          |       |              | Black peat with minor dark greyish brown clayey silts, Dh fragments at 4 cm, from 8-10 cm increase to greyish brown organic-rich clayey silt<br>Dh1 Dl1 Th1 Ag1 As++ | 4   | 0    | 3    | 1/2  |     |
| 10         |       |              | Dark grey organic-rich silty clay As2 Ag1 Sh1 Th+                                                                                                                    | 4   | 0    | 2.5  | 1    | 2   |
|            |       |              | Brownish grey, organic-rich silty clay Dg As1 Ag1 Dh1 Dg1 Th+ Sh+                                                                                                    | 3   | 0    | 2.5  | 1    |     |
| 20         |       |              | Grey silty clay As2 Ag2 Dh++ Dl+ Th+                                                                                                                                 | 3   | 0    | 2.5  | 1    |     |
|            |       |              | Dark brown silty clay with As2 Ag2 Dh++ Dg++ Dl+ Th+                                                                                                                 | 3   | 0    | 2.5  | 0.5  |     |
| 30         |       |              |                                                                                                                                                                      |     |      |      |      | MB  |
| 40         |       |              |                                                                                                                                                                      |     |      |      |      |     |
| 50         |       |              |                                                                                                                                                                      |     |      |      |      |     |

Overlying vegetation: 50% *Machaerina juncea*, 50% *Apodasmia similis*. Trace: *Austroderia splendens*. Based on Oka-MM2, this core represents salt marsh all the way down to the base.

**Figure S4:** Detailed stratigraphic log for core Oka-MM1 from Okatakata following the Troels-Smith (1955) sediment classification system. MB = marsh base.

Core Awa-MM2

Coordinates: - 35.0106002, 173.2612322

Author: O. Albot & D.J. King

| Depth (cm) | Photo | Illustration | Description and components                                    | Nig      | Strf | Sicc | Elas | Lim |    |
|------------|-------|--------------|---------------------------------------------------------------|----------|------|------|------|-----|----|
| 0          |       |              | Dark chocolate brown rooty, silty peat<br>Sh2 Th1 Ag1         | 3.5      | 1    | 2    | 2    |     | SF |
| 10         |       |              | Pale orangeish beige rooty clay<br>Ag2 Th1 Sh1                | 2        | 0    | 2    | 0    | 3   |    |
| 20         |       |              | Dark blue-grey densely rooty clay<br>Th3 As1                  | 3.5 to 4 | 0    | 2    | 0    | 3   |    |
| 40         |       |              | Medium brown, rooty, organic-rich clay<br>As2 Th1 Sh1         | 3        | 0    | 2    | 0    | 2   |    |
| 50         |       |              | Down-core transition to peat                                  |          |      |      |      |     | SF |
| 60         |       |              | Dark, chocolate brown, subtly fibrous peat<br>Sh3 Th1 Th+ As+ | 3.5      | 0    | 2    | 1.5  | 1   |    |
| 90         |       |              |                                                               |          |      |      |      |     | SF |
| 100        |       |              |                                                               |          |      |      |      |     |    |

Overlying vegetation: 100% *Apodasmia similis*

On the basis of foraminifera (and sedimentology), this core is saltmarsh all the way to the base, and the underlying mud/sandflat was not reached

**Figure S5:** Detailed stratigraphic log for core Awa-MM2 from Awanui following the Troels-Smith (1955) sediment classification system. SF = saltmarsh foraminifera.

**Table S2:** The results of Levene's, Shapiro-Wilk's and Kruskal-Wallis tests for Total Organic Carbon (TOC; wt%), Total Nitrogen (TN; wt%), Carbon Density (CD; g cm<sup>-3</sup>), and Dry Bulk Density (DBD; g cm<sup>-3</sup>). For each test, the p-value is reported along with the test statistic and degrees of freedom (or sample size for Shapiro-Wilk's test) in brackets. Oka – Okatakata; Awa – Awanui; Oma – Omaia; Pau – Pāuatahanui; Puk – Robert Findlay.

| Variable                       | Levene's p-Value Across Sites        | Shapiro-Wilk's p-Value By Site                                                                                                                                              | Kruskal-Wallis p-Value Across Sites | Kruskal-Wallis p-Value By Vegetation Zone                                                                                                                             |
|--------------------------------|--------------------------------------|-----------------------------------------------------------------------------------------------------------------------------------------------------------------------------|-------------------------------------|-----------------------------------------------------------------------------------------------------------------------------------------------------------------------|
| <b>TOC (wt%)</b>               | 1.31E-05<br>(F=7.27, df1=4, df2=309) | Pau: 3.96E-05<br>(W=0.93, n=97)<br>Puk: 4.16E-02<br>(W=0.92, n=25)<br>Oma: 1.30E-09<br>(W=0.71, n=61)<br>Oka: 6.79E-14<br>(W=0.54, n=75)<br>Awa: 4.57E-07<br>(W=0.81, n=56) | 4.47E-16<br>(H=78.07, df=4)         | Pau: 0.0262<br>(H=7.28, df=2)<br>Puk: 0.6472<br>(0.87, df=2)<br>Oma: 0.0019<br>(H=12.54, df=2)<br>Oka: 0.0002<br>(H=17.51, df=2)<br>Awa: 0.0027<br>(H=9.00, df=1)     |
| <b>TN (wt%)</b>                | 3.08E-03<br>(F=4.08, df1=4, df2=309) | Pau: 1.23E-03<br>(W=0.93, n=97)<br>Puk: 7.27E-02<br>(W=0.94, n=25)<br>Oma: 3.73E-10<br>(W=0.69, n=61)<br>Oka: 1.39E-11<br>(W=0.68, n=75)<br>Awa: 3.10E-03<br>(W=0.93, n=56) | 9.44E-14<br>(H=67.07, df=4)         | Pau: 0.006<br>(H=10.15, df=2)<br>Puk: 0.0336<br>(H=2.18, df=2)<br>Oma: 0.002<br>(H=12.73, df=2)<br>Oka: 1.86E-04<br>(H=17.18, df=2)<br>Awa: 0.0458<br>(H=3.99, df=1)  |
| <b>CD (g cm<sup>-3</sup>)</b>  | 1.10E-04<br>(F=6.03, df1=4, df2=309) | Pau: 0.0159<br>(W=0.97, n=97)<br>Puk: 0.0082<br>(W=0.88, n=25)<br>Oma: 9.30E-08<br>(W=0.80, n=61)<br>Oka: 1.35E-8<br>(W=0.84, n=75)<br>Awa: 0.0005<br>(W=0.910, n=56)       | 8.19E-08<br>(H=38.66, df=4)         | Pau: 0.3981<br>(H=1.84, df=2)<br>Puk: 0.9557<br>(H=0.10, df=2)<br>Oma: 0.00547<br>(H=15.43, df=2)<br>Oka: 0.0057<br>(H=10.34, df=2)<br>Awa: 0.00359<br>(H=8.48, df=1) |
| <b>DBD (g cm<sup>-3</sup>)</b> | 1.08E-07<br>(F=10.10 df1=4, df2=309) | Pau: 7.35E-08<br>(W=0.87, n=97)<br>Puk: 0.0777<br>(W=0.93, n=25)<br>Oma: 0.00025<br>(W=0.909, n=61)<br>Oka: 0.0061<br>(W=0.95, n=75)<br>Awa: 2.79E-07<br>(W=0.80, n=56)     | 2.2E-16<br>(H=106.06, df=4)         | Pau: 0.0099<br>(H=9.24, df=2)<br>Puk: 0.954<br>(H=0.10, df=2)<br>Oma: 0.0058<br>(H=10.23, df=2)<br>Oka: 0.04627<br>(H=6.15, df=2)<br>Awa: 0.2075<br>(H=1.59, df=1)    |

**Table S3:** The results of the *post-hoc* Dunn tests for all sites: Oka – Okatakata; Awa – Awanui; Oma – Omaia; Pau – Pāuatahanui; Puk – Robert Findlay. The final p-value was obtained by applying the Benjamini-Hochberg correction.

| <b>Total Organic Carbon (wt%)</b>           |          |          |          |          |
|---------------------------------------------|----------|----------|----------|----------|
|                                             | Oka      | Oma      | Pau      | Puk      |
| Awa                                         | 1.45E-02 | 2.83E-06 | 8.04E-02 | 1.28E-02 |
| Oka                                         | -        | 1.16E-02 | 2.94E-06 | 6.56E-06 |
| Oma                                         | -        | -        | 1.16E-12 | 4.44E-10 |
| Pau                                         | -        | -        | -        | 1.45E-01 |
| <b>Total Nitrogen (wt%)</b>                 |          |          |          |          |
|                                             | Oka      | Oma      | Pau      | Puk      |
| Awa                                         | 0.5370   | 0.0054   | 0.0027   | 0.0001   |
| Oka                                         | -        | 0.0166   | 6.8E-05  | 4E-06    |
| Oma                                         | -        | -        | 3.69E-10 | 6.97E-10 |
| Pau                                         | -        | -        | -        | 0.0342   |
| <b>Carbon Density (g cm<sup>-3</sup>)</b>   |          |          |          |          |
|                                             | Oka      | Oma      | Pau      | Puk      |
| Awa                                         | 1.29E-02 | 1.88E-02 | 2.02E-01 | 1.61E-03 |
| Oka                                         | -        | 9.45E-01 | 1.35E01  | 1.73E-07 |
| Oma                                         | -        | -        | 1.67E01  | 2.79E-07 |
| Pau                                         | -        | -        | -        | 1.06E05  |
| <b>Dry Bulk Density (g cm<sup>-3</sup>)</b> |          |          |          |          |
|                                             | Oka      | Oma      | Pau      | Puk      |
| Awa                                         | 0.1491   | 3.11E-08 | 8.66E-04 | 6.44E-01 |
| Oka                                         | -        | 8.64E-06 | 8.16E-08 | 5.31E-01 |
| Oma                                         | -        | -        | 3.49E-23 | 9.82E-05 |
| Pau                                         | -        | -        | -        | 2.83E-03 |







**Table S7:** The results of the *post-hoc* Dunn tests for Awanui. The final p-value was obtained by applying the Benjamini-Hochberg correction.

| <b>Total Organic Carbon (wt%)</b>           |         |         |         |         |         |
|---------------------------------------------|---------|---------|---------|---------|---------|
|                                             | Awa-LM2 | Awa-LM3 | Awa-MM1 | Awa-MM2 | Awa-MM3 |
| Awa-LM1                                     | 0.9154  | 0.2584  | 0.5262  | 0.0088  | 0.2413  |
| Awa-LM2                                     | -       | 0.4331  | 0.5720  | 0.1150  | 0.4246  |
| Awa-LM3                                     | -       | -       | 0.5118  | 0.1978  | 0.9339  |
| Awa-MM1                                     | -       | -       | -       | 0.0075  | 0.4832  |
| Awa-MM2                                     | -       | -       | -       | -       | 0.0939  |
| <b>Total Nitrogen (wt%)</b>                 |         |         |         |         |         |
|                                             | Awa-LM2 | Awa-LM3 | Awa-MM1 | Awa-MM2 | Awa-MM3 |
| Awa-LM1                                     | 0.9154  | 0.0679  | 0.3565  | 0.0142  | 0.1971  |
| Awa-LM2                                     | -       | 0.2681  | 0.5583  | 0.2459  | 0.4247  |
| Awa-LM3                                     | -       | -       | 0.2383  | 0.7439  | 0.4951  |
| Awa-MM1                                     | -       | -       | -       | 0.0902  | 0.6024  |
| Awa-MM2                                     | -       | -       | -       | -       | 0.2061  |
| <b>Carbon Density (g cm<sup>-3</sup>)</b>   |         |         |         |         |         |
|                                             | Awa-LM2 | Awa-LM3 | Awa-MM1 | Awa-MM2 | Awa-MM3 |
| Awa-LM1                                     | 0.9610  | 0.8124  | 0.7948  | 0.0290  | 0.9158  |
| Awa-LM2                                     | -       | 0.7939  | 0.8462  | 0.0600  | 0.8713  |
| Awa-LM3                                     | -       | -       | 0.7782  | 0.0199  | 0.7638  |
| Awa-MM1                                     | -       | -       | -       | 0.0001  | 0.8563  |
| Awa-MM2                                     | -       | -       | -       | -       | 0.0004  |
| <b>Dry Bulk Density (g cm<sup>-3</sup>)</b> |         |         |         |         |         |
|                                             | Awa-LM2 | Awa-LM3 | Awa-MM1 | Awa-MM2 | Awa-MM3 |
| Awa-LM1                                     | 0.1893  | 0.0509  | 0.0164  | 0.0670  | 0.0113  |
| Awa-LM2                                     | -       | 0.9424  | 0.9425  | 0.7059  | 0.9673  |
| Awa-LM3                                     | -       | -       | 0.7548  | 0.7700  | 0.8475  |
| Awa-MM1                                     | -       | -       | -       | 0.1602  | 0.9573  |
| Awa-MM2                                     | -       | -       | -       | -       | 0.1963  |

**Table S8:** Mean ( $\pm$  standard error) values for Total Organic Carbon (TOC; wt%), Total Nitrogen (TN; wt%), Dry Bulk Density (DBD; g cm<sup>-3</sup>), Carbon Density (CD; g cm<sup>-3</sup>), and carbon stocks (Mg C ha<sup>-1</sup>) for all study sites. The carbon stocks were calculated for the top 10 cm (standardised where required) and the total length of the marsh deposits at all sites.

| Site                                    | TOC<br>(%, mean $\pm$ SE) | TN<br>(%, mean $\pm$ SE) | DBD<br>(g cm <sup>-3</sup> , mean $\pm$ SE) | CD<br>(g cm <sup>-3</sup> , mean $\pm$ SE) | Carbon Stock<br>(Mg C ha <sup>-1</sup> ; standardised to 10 cm $\pm$ SE) | Carbon Stock<br>(Mg C ha <sup>-1</sup> ; mean to marsh base $\pm$ SE) | Dominant Vegetation                                                                                                                                                                                          |
|-----------------------------------------|---------------------------|--------------------------|---------------------------------------------|--------------------------------------------|--------------------------------------------------------------------------|-----------------------------------------------------------------------|--------------------------------------------------------------------------------------------------------------------------------------------------------------------------------------------------------------|
| <b>Pāuatahanui<br/>(site mean)</b>      | 9.6 $\pm$ 0.7             | 0.60 $\pm$ 0.04          | 0.40 $\pm$ 0.03                             | 0.03 $\pm$ 0.001                           | 30.2 $\pm$ 3.3                                                           | 51.4 $\pm$ 7.3                                                        |                                                                                                                                                                                                              |
| Low marsh<br>(n=4; 15, 18, 28 & 30 cm)  | 9.2 $\pm$ 1.2             | 0.49 $\pm$ 0.05          | 0.44 $\pm$ 0.06                             | 0.03 $\pm$ 0.002                           | 31.4 $\pm$ 4.8                                                           | 51.3 $\pm$ 10.9                                                       | <i>Juncus kraussii</i>                                                                                                                                                                                       |
| Mid marsh<br>(n=4; 15, 16, 20 & 44 cm)  | 11.7 $\pm$ 1.3            | 0.75 $\pm$ 0.06          | 0.33 $\pm$ 0.04                             | 0.03 $\pm$ 0.001                           | 30.0 $\pm$ 4.8                                                           | 60.7 $\pm$ 16.1                                                       | <i>Apodasmia similis</i> , <i>Plagianthus divaricatus</i> ,<br><i>Typha orientalis</i>                                                                                                                       |
| High marsh<br>(n=4; 16, 20, 24 & 27 cm) | 7.3 $\pm$ 1.3             | 0.51 $\pm$ 0.07          | 0.45 $\pm$ 0.03                             | 0.02 $\pm$ 0.003                           | 29.4 $\pm$ 8.3                                                           | 42.3 $\pm$ 6.3                                                        | <i>Plagianthus divaricatus</i> , <i>Lolium arundinaceum</i> ,<br><i>Poa annua</i> , <i>Bromus catharticus</i> , <i>Carex coriacea</i>                                                                        |
| <b>Robert Findlay<br/>(site mean)</b>   | 10.0 $\pm$ 1.0            | 0.76 $\pm$ 0.07          | 0.64 $\pm$ 0.07                             | 0.05 $\pm$ 0.006                           | 40.0 $\pm$ 7.8                                                           | 41.3 $\pm$ 9.4                                                        |                                                                                                                                                                                                              |
| Low marsh<br>(n=3; 10, 5 & 5 cm)        | 8.1 $\pm$ 1.1             | 0.61 $\pm$ 0.06          | 0.67 $\pm$ 0.11                             | 0.05 $\pm$ 0.005                           | 41.6 $\pm$ 7.6                                                           | 30.0 $\pm$ 12.8                                                       | <i>Salicornia quinqueflora</i> , <i>Samolus repens</i>                                                                                                                                                       |
| Mid marsh<br>(n=3; 12, 12 & 10 cm)      | 11.4 $\pm$ 1.9            | 0.74 $\pm$ 0.11          | 0.69 $\pm$ 0.16                             | 0.06 $\pm$ 0.01                            | 46.0 $\pm$ 24.2                                                          | 50.0 $\pm$ 28.9                                                       | <i>Carex divisa</i> , <i>Selliera radicans</i> , <i>Isolepis cernua</i>                                                                                                                                      |
| High marsh<br>(n=3; 5, 10 & 10 cm)      | 9.9 $\pm$ 2.0             | 0.90 $\pm$ 0.15          | 0.56 $\pm$ 0.05                             | 0.05 $\pm$ 0.01                            | 58.0 $\pm$ 13.4                                                          | 43.9 $\pm$ 1.7                                                        | <i>Polypogon viridis</i> , <i>Epilobium ciliatum</i> , <i>Bromus catharticus</i> , <i>Carex divisa</i> ,                                                                                                     |
| <b>Omaia<br/>(site mean)</b>            | 2.7 $\pm$ 0.4             | 0.247 $\pm$ 0.04         | 1.9 $\pm$ 0.07                              | 0.03 $\pm$ 0.005                           | 35.9 $\pm$ 7.4                                                           | 62.9 $\pm$ 11.7                                                       |                                                                                                                                                                                                              |
| Low marsh<br>(n=3; 20, 30 & 34 cm)      | 2.2 $\pm$ 0.5             | 0.23 $\pm$ 0.05          | 1.5 $\pm$ 0.13                              | 0.03 $\pm$ 0.004                           | 40.6 $\pm$ 19.2                                                          | 72.3 $\pm$ 22.6                                                       | Pasture grasses and legumes, <i>Cotula coronopifolia</i> , <i>Lagurus ovatus</i> , <i>Polypogon monspeliensis</i> , <i>Lobelia anceps</i> , patchy <i>Juncus kraussii</i> and <i>Salicornia quinqueflora</i> |
| Mid marsh<br>(n=3; 14, 20 & 20 cm)      | 4.3 $\pm$ 0.9             | 0.44 $\pm$ 0.10          | 0.87 $\pm$ 0.05                             | 0.04 $\pm$ 0.006                           | 40.0 $\pm$ 6.9                                                           | 60.8 $\pm$ 8.2                                                        |                                                                                                                                                                                                              |
| High marsh<br>(n=3; 20, 22 & 29.5 cm)   | 2.1 $\pm$ 0.5             | 0.21 $\pm$ 0.06          | 1.0 $\pm$ 0.06                              | 0.02 $\pm$ 0.004                           | 27.3 $\pm$ 13.2                                                          | 55.1 $\pm$ 31.3                                                       |                                                                                                                                                                                                              |
| <b>Okatakata<br/>(site mean)</b>        | 5.5 $\pm$ 0.9             | 0.38 $\pm$ 0.05          | 0.70 $\pm$ 0.04                             | 0.02 $\pm$ 0.002                           | 29.2 $\pm$ 5.3                                                           | 54.2 $\pm$ 9.7                                                        |                                                                                                                                                                                                              |
| Low marsh<br>(n=3; 30, 30 & 47 cm)      | 2.1 $\pm$ 0.1             | 0.20 $\pm$ 0.02          | 0.78 $\pm$ 0.06                             | 0.02 $\pm$ 0.002                           | 15.8 $\pm$ 10.3                                                          | 46.3 $\pm$ 28.2                                                       | <i>Juncus kraussii</i> , <i>Salicornia quinqueflora</i>                                                                                                                                                      |
| Mid marsh<br>(n=3; 20, 20 & 30 cm)      | 8.3 $\pm$ 2.3             | 0.48 $\pm$ 0.10          | 0.74 $\pm$ 0.09                             | 0.03 $\pm$ 0.004                           | 37.6 $\pm$ 8.6                                                           | 62.2 $\pm$ 18.5                                                       | <i>Apodasmia similis</i> , <i>Machaerina juncea</i>                                                                                                                                                          |
| High marsh<br>(n=3; 15, 20 & 20 cm)     | 8.0 $\pm$ 2.0             | 0.61 $\pm$ 0.10          | 0.51 $\pm$ 0.06                             | 0.03 $\pm$ 0.002                           | 34.3 $\pm$ 5.4                                                           | 54.0 $\pm$ 8.2                                                        | <i>Austroderia splendens</i> , <i>Ficinia nodosa</i> ,<br><i>Cortaderia jubata</i>                                                                                                                           |
| <b>Awanui<br/>(site mean)</b>           | 6.9 $\pm$ 0.8             | 0.36 $\pm$ 0.03          | 0.61 $\pm$ 0.05                             | 0.03 $\pm$ 0.003                           | 30.6 $\pm$ 15.2                                                          | 92.3 $\pm$ 66.2                                                       |                                                                                                                                                                                                              |
| Low marsh<br>(n=3; 5, 6, and 30 cm)     | 2.6 $\pm$ 0.8             | 0.22 $\pm$ 0.06          | 0.96 $\pm$ 0.24                             | 0.01 $\pm$ 0.003                           | 28.3 $\pm$ 12.0                                                          | 19.7 $\pm$ 15.6                                                       | <i>Salicornia quinqueflora</i> , <i>Juncus kraussii</i> (newly colonised low marsh and juvenile plants for 5 and 6 cm long cores)                                                                            |
| Mid marsh<br>(n=3; 40, 45, 95 cm)       | 7.7 $\pm$ 0.9             | 0.38 $\pm$ 0.03          | 0.54 $\pm$ 0.03                             | 0.04 $\pm$ 0.003                           | 32.8 $\pm$ 20.7                                                          | 165.0 $\pm$ 127.9                                                     | <i>Apodasmia similis</i> (40 and 45 cm cores were retrieved from mid marsh zones with patchy vegetation)                                                                                                     |

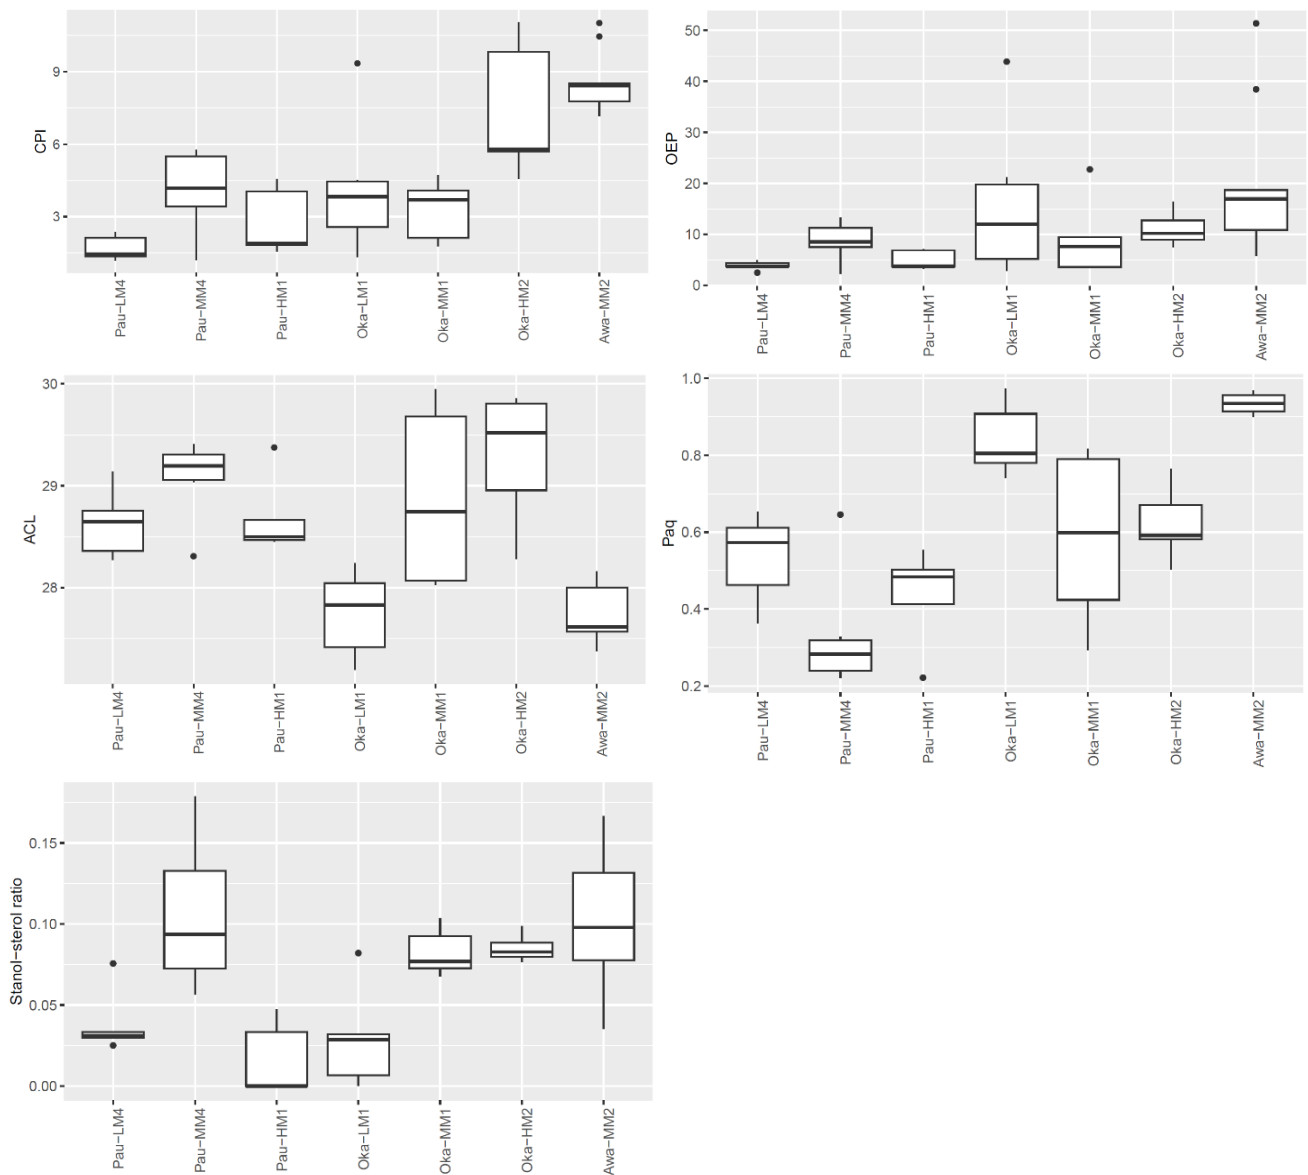

**Figure S6:** Boxplots showing the values of each biomarker index for all sampled cores at Pāuatahanui (Pau), Okatakata (Oka) and Awanui (Awa) for low marsh (LM), mid marsh (MM) and high marsh (HM). Topmost:  $P_{aq}$  (left) and ACL (right); middle: CPI (left) and OEP (right); bottom: stanol-sterol ratio.

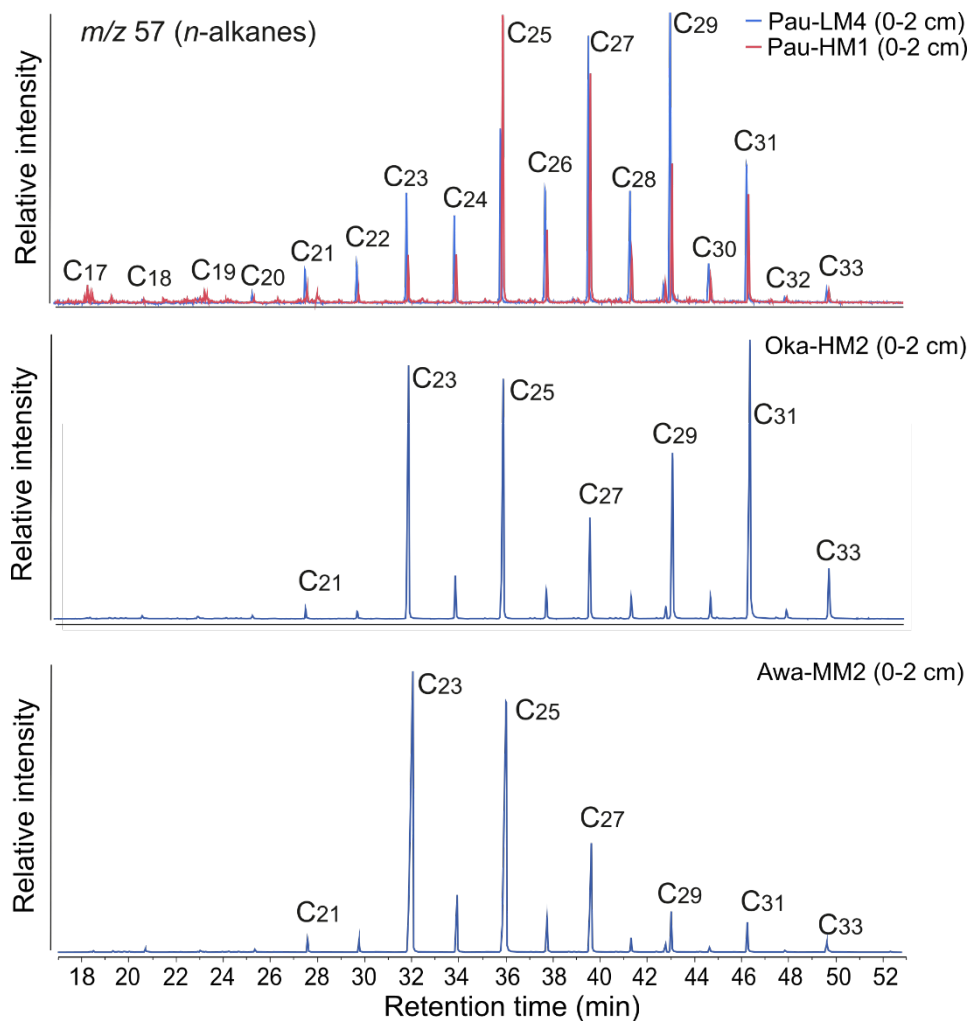

**Figure S7:** Example ion fragmentograms ( $m/z$  57) for samples from Pāuatahanui (Pau), Okatakata (Oka) and Awanui (Awa) showing the  $n$ -alkane distributions present in the apolar fractions of the total lipid extracts (TLEs).

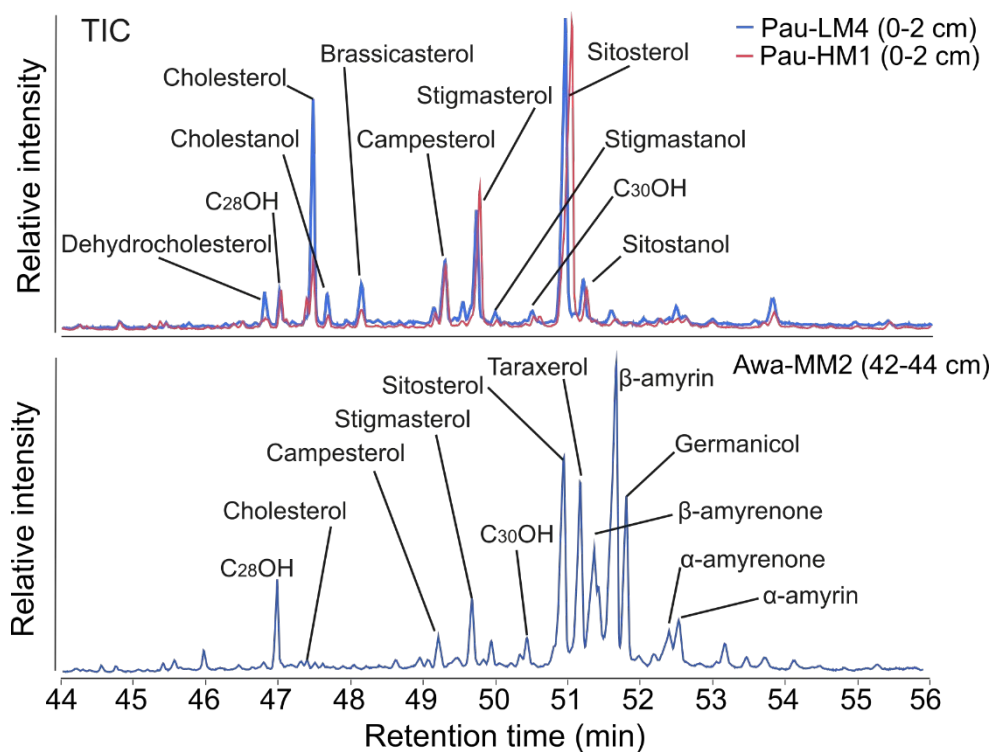

**Figure S8:** Example of Total Ion Current (TIC) signal for samples from Pāuatahanui (Pau) and Awanui (Awa) showing the distributions of sterols and their respective stanols, as well as plant terpenoids, present in the polar fractions of the total lipid extracts (TLEs).

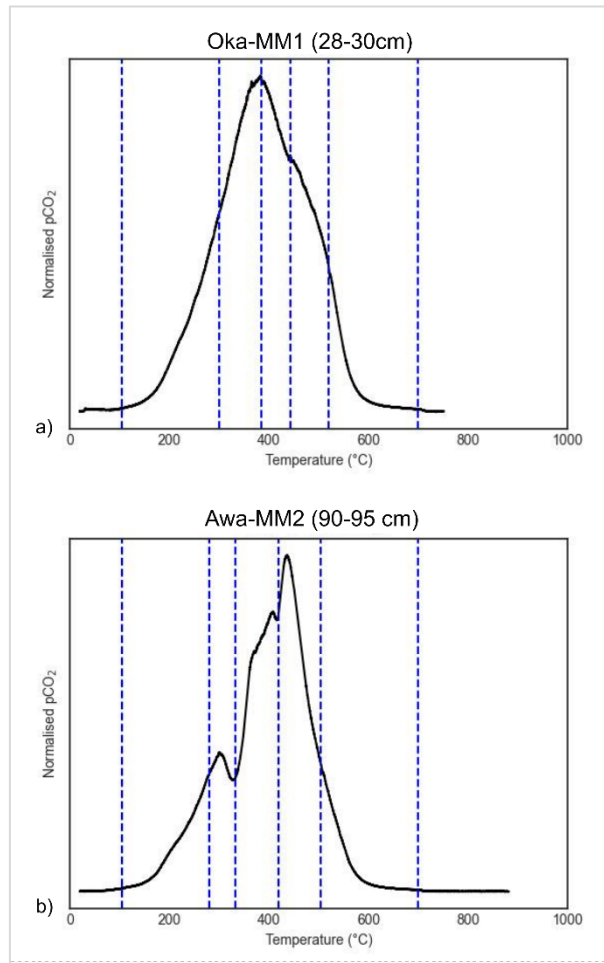

**Figure S9:** RPO-AMS thermographs for a) Okatakata sample Oka-MM1 (28-30 cm) and b) Awanui sample Awa-MM2 (90-95 cm). The x-axis is the temperature during ramped heating of the sample (°C), with the dotted blue lines representing the obtained pyrolytic splits. The y-axis is the CO<sub>2</sub> evolution normalised to account for sample size differences.

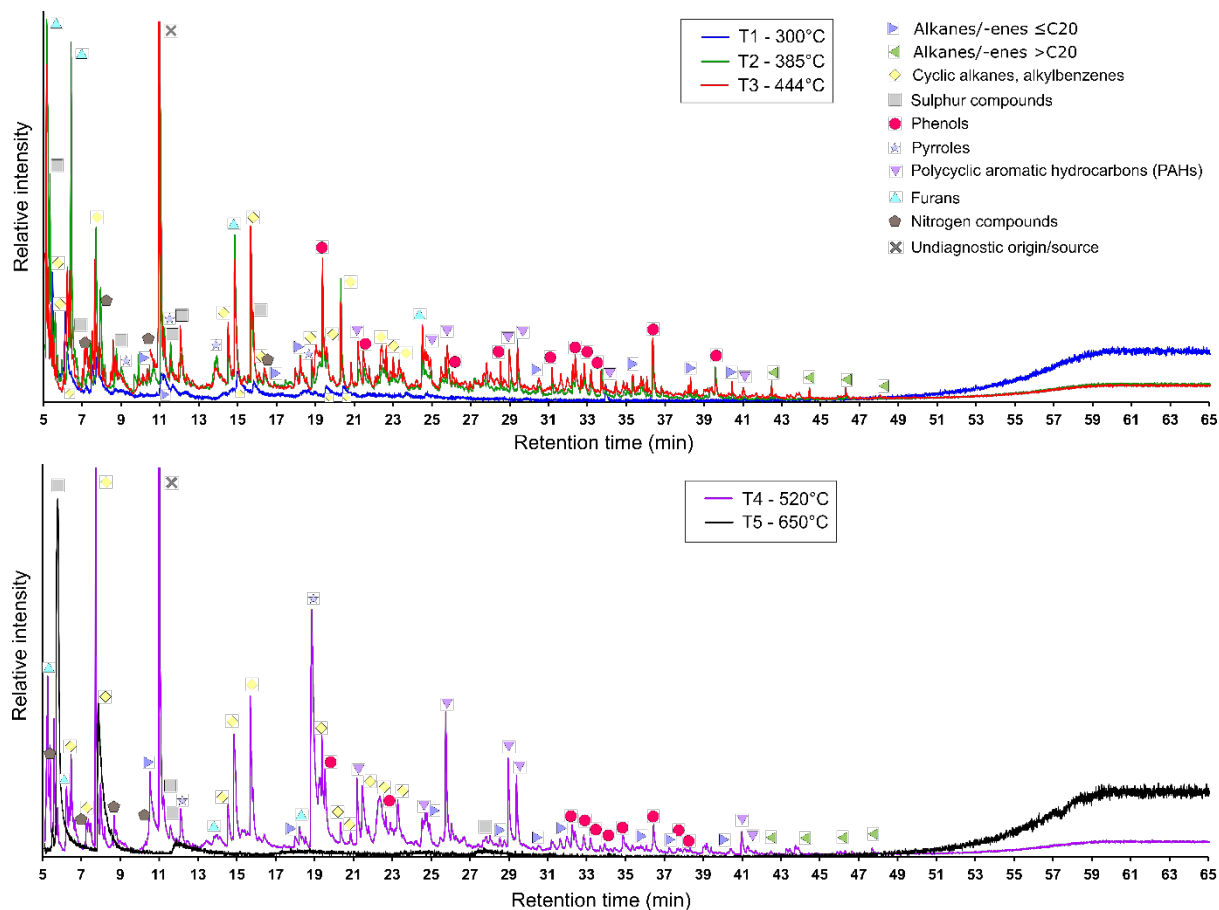

**Figure S10:** Example chromatograms of the different temperature splits obtained following ramped pyrolysis gas chromatography mass spectrometry (Py-GC-MS). The sample chromatogram is for one sample from Okatakata, Oka-MM2 (28-30 cm).

**Table S9:** Results of hierarchical cluster analysis for elemental, stable isotopes and XRF datasets for all samples. The matrix shows p-values for each variable in Clusters 1, 2, and 3, compared to the overall mean of that variable across the entire dataset.

| Variable  | Cluster 1 | Cluster 2 | Cluster 3 |
|-----------|-----------|-----------|-----------|
| TOC       | 5.00E-20  | 1.40E-03  | 1.28E-02  |
| TN        | 2.00E-20  | 2.20E-03  | 2.80E-03  |
| CD        | 4.80E-08  | 1.16E-02  | 1.63E-01  |
| DBD       | 3.90E-05  | 1.10E-04  | 5.61E-01  |
| delta_13C | 3.80E-07  | 2.28E-01  | 3.40E-03  |
| C:N       | 2.70E-05  | 3.50E-04  | 8.66E-01  |
| S         | 9.22E-01  | 6.74E-02  | 4.80E-03  |
| Al        | 1.20E-05  | 8.24E-01  | 1.40E-04  |
| Ti        | 2.30E-04  | 8.50E-03  | 1.70E-14  |
| Si        | 2.70E-09  | 8.10E-07  | 8.39E-01  |
| Fe        | 7.62E-02  | 7.80E-04  | 1.90E-11  |
| Zr:Rb     | 8.50E-08  | 2.25E-02  | 1.33E-02  |

**Table S10:** Results of hierarchical cluster analysis for elemental, stable isotope, and XRF datasets for all samples. The matrix shows p-values for differences in each variable between Clusters 1, 2 and 3.

| Variable  | Cluster 1 vs Cluster 2 | Cluster 1 vs Cluster 3 | Cluster 2 vs Cluster 3 |
|-----------|------------------------|------------------------|------------------------|
| TOC       | 0.00E+00               | 0.00E+00               | 5.02E-05               |
| TN        | 0.00E+00               | 0.00E+00               | 5.30E-01               |
| CD        | 5.42E-18               | 6.62E-13               | 6.62E-03               |
| DBD       | 1.43E-16               | 2.22E-17               | 2.12E-04               |
| delta_13C | 1.41E-12               | 0.00E+00               | 4.06E-03               |
| C:N       | 1.00E-20               | 4.47E-05               | 1.48E-13               |
| S         | 1.05E-08               | 1.14E-02               | 2.13E-06               |
| Al        | 3.79E-05               | 0.00E+00               | 3.05E-14               |
| Ti        | 5.17E-01               | 0.00E+00               | 0.00E+00               |
| Si        | 0.00E+00               | 6.23E-14               | 3.00E-19               |
| Fe        | 1.15E-06               | 0.00E+00               | 0.00E+00               |
| Zr:Rb     | 1.00E-20               | 0.00E+00               | 8.48E-01               |

**Table S11:** Results of hierarchical cluster analysis for elemental, stable isotope, XRF and biomarker indices. The matrix shows p-values for each variable in Clusters 1, 2, and 3, compared to the overall mean of that variable across the entire dataset.

| Variable  | Cluster 1 | Cluster 2 | Cluster 3 |
|-----------|-----------|-----------|-----------|
| TOC       | 0.0019    | 0.4831    | 0.1415    |
| TN        | 0.0017    | 0.4638    | 0.1094    |
| CD        | 0.0860    | 0.4959    | 0.5708    |
| DBD       | 0.0344    | 0.7658    | 0.0498    |
| delta_13C | 0.2250    | 0.6268    | 0.0406    |
| C:N       | 0.2288    | 0.7319    | 0.5429    |
| Sr        | 0.6926    | 0.0146    | 0.0619    |
| S         | 0.7416    | 0.5161    | 0.0542    |
| Ti        | 0.2956    | 0.1610    | 0.0002    |
| Si        | 0.0650    | 0.2506    | 0.6222    |
| K         | 0.7243    | 0.0592    | 0.1238    |
| Fe        | 0.6797    | 0.2409    | 0.0183    |
| Zr:Rb     | 0.0526    | 0.2584    | 0.4379    |
| CPI       | 0.5987    | 0.2296    | 0.3768    |
| OEP       | 0.7049    | 0.4248    | 0.0208    |
| ACL       | 0.1647    | 0.6536    | 0.0216    |
| Paq       | 0.2584    | 0.3298    | 0.0077    |

**Table S12:** Results of hierarchical cluster analysis for elemental, stable isotopes, XRF and lipid biomarker datasets. The matrix shows p-values for differences in each variable between Clusters 1, 2, and 3.

| Variable  | Cluster 1 vs Cluster 2 | Cluster 1 vs Cluster 3 | Cluster 2 vs Cluster 3 |
|-----------|------------------------|------------------------|------------------------|
| TOC       | 0.0001                 | 0.0001                 | 0.8216                 |
| TN        | 1.1E-06                | 8.0E-07                | 0.9547                 |
| CD        | 0.0256                 | 0.0568                 | 0.1197                 |
| DBD       | 0.0028                 | 6.2E-09                | 0.2986                 |
| delta_13C | 0.5472                 | 0.0041                 | 0.0010                 |
| C:N       | 0.1616                 | 0.1616                 | 0.7599                 |
| Sr        | 1.2E-06                | 0.0927                 | 3.8E-10                |
| S         | 0.0282                 | 0.0781                 | 0.0245                 |
| Ti        | 0.0715                 | 9.8E-08                | 7.4E-09                |
| Si        | 0.0000                 | 0.0015                 | 0.0201                 |
| K         | 0.0013                 | 0.2964                 | 1.1E-12                |
| Fe        | 0.0267                 | 0.0082                 | 0.0001                 |
| Zr:Rb     | 0.0030                 | 0.0000                 | 0.2942                 |
| CPI       | 0.0030                 | 0.9902                 | 0.0001                 |
| OEP       | 0.0024                 | 0.0324                 | 0.0024                 |
| ACL       | 0.3092                 | 0.0008                 | 0.0005                 |
| Paq       | 0.6345                 | 0.0006                 | 1.8E-06                |

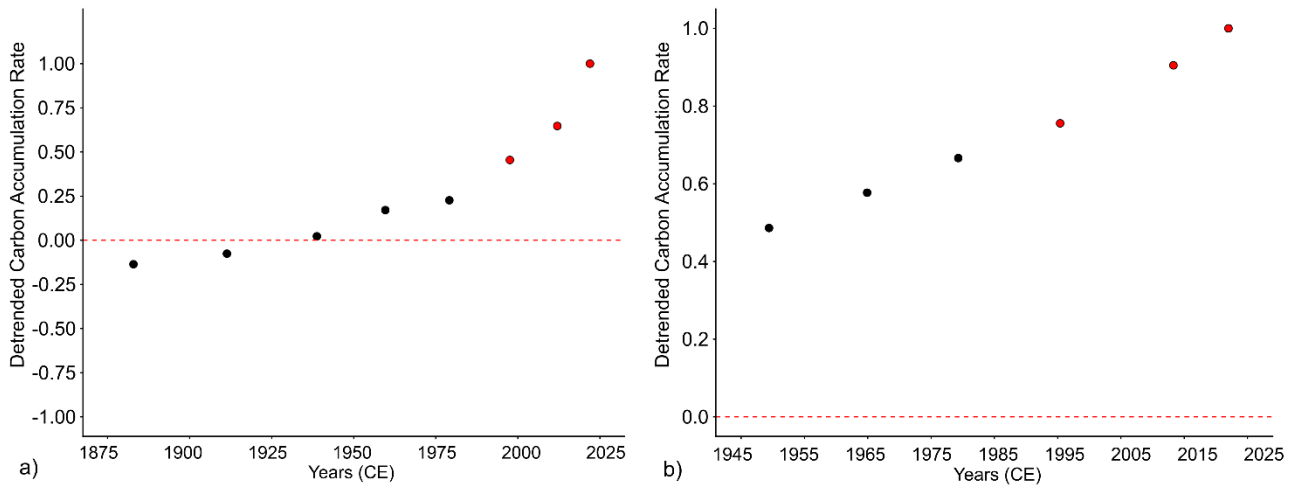

**Figure S11:** Detrended and normalised CARs (unitless) at a) Pāuatahanui core Pau-HM3 and b) Robert Findlay core Puk-MM1. Black circles represent pre-restoration rates, and red circles represent post-restoration rates. CARs were derived for each age-depth interval and detrended using the Okatakata age-depth model to remove natural near-surface increases. Rates were normalised to the maximum observed value within each core. Post-restoration mean normalised CARs were 0.70 at Pāuatahanui (after 1984) and 0.89 at Robert Findlay (after 1980), indicating substantial improvement in carbon accumulation relative to the restoration baseline.
